# Supplementary material
Source: PubMed Central journal article supplement (PMC3789385)
Supplement: NIHMS516509-supplement-1_si_001.pdf [file NIHMS516509-supplement-1_si_001.pdf]

## Supporting Information

# Development of new deoxycytidine kinase inhibitors and non-invasive *in vivo* evaluation using Positron Emission Tomography

Jennifer M. Murphy<sup>‡,1,2</sup>, Amanda L. Armijo<sup>‡,1,2</sup>, Julian Nomme<sup>‡,3</sup>, Chi Hang Lee<sup>1,2</sup>, Quentin A. Smith<sup>4</sup>, Zheng Li<sup>1,2</sup>, Dean O. Campbell<sup>1,2</sup>, Hsiang-I Liao<sup>1,2</sup>, David A. Nathanson<sup>1,2</sup>, Wayne R. Austin<sup>1,2</sup>, Jason T. Lee<sup>1,2</sup>, Ryan Darvish<sup>1,2</sup>, Liu Wei<sup>1,2</sup>, Jessica Jue Wang<sup>1,2</sup>, Ying Su<sup>3</sup>, Robert Damoiseaux<sup>5</sup>, Saman Sadeghi<sup>1,2</sup>, Michael E. Phelps<sup>1</sup>, Harvey R. Herschman<sup>1,6</sup>, Johannes Czernin<sup>1,2</sup>, Anastassia N. Alexandrova<sup>4</sup>, Michael E. Jung<sup>4</sup>, Arnon Lavie<sup>\*,3</sup>, and Caius G. Radu<sup>\*,1,2</sup>

<sup>1</sup>Department of Molecular and Medical Pharmacology, <sup>2</sup>Ahmanson Translational Imaging Division, <sup>4</sup>Department of Chemistry and Biochemistry, <sup>5</sup>California Nanosciences Institute, <sup>6</sup>Department of Biological Chemistry, University of California, Los Angeles, 650 Charles E. Young Dr. S., Los Angeles, California 90095, USA, <sup>3</sup>Department of Biochemistry and Molecular Genetics, University of Illinois at Chicago, 900 S. Ashland Avenue, M/C 669, Chicago, Illinois 60607, USA

E-mail: CRadu@mednet.ucla.edu

---

## Table of Contents

|                                                                        |     |
|------------------------------------------------------------------------|-----|
| Spectroscopic Data for Compounds <b>8 – 14, 16 – 18, 25 - 37</b> ..... | S2  |
| Figure S1. HTS Schematic.....                                          | S15 |
| Scheme S2. Synthesis of compounds <b>8a</b> and <b>8b</b> .....        | S15 |
| Scheme S3. Synthesis of compound <b>37</b> .....                       | S16 |
| Figure S4. Optimization of PET assay.....                              | S16 |

**For a general method for the synthesis of compounds 8 - 14 follow the procedure for the synthesis of 15a with one modification to step 3:** a mixture of thioamide and 1,3-dichloroacetone (2 equiv.) in ethanol was stirred under refluxing conditions for 2.5 h. The resulting mixture was cooled and concentrated *in vacuo* to remove residual solvent. The crude residue was purified by flash column chromatography over silica gel.

**2-(((2-(4-(2-fluoroethoxy)-3-methoxyphenyl)thiazol-4-yl)methyl)thio)pyrimidine-4,6-**

**diamine (8a).**  $^1\text{H}$  NMR (500 MHz, DMSO- $d_6$ )  $\delta$ : 7.52 (s, 1H), 7.42 – 7.38 (m, 2H), 7.03 (d,  $J$  = 8.5 Hz, 1H), 6.13 (brs, 4H), 5.11 (s, 1H), 4.72 (dt,  $J$  = 48.0, 4.0 Hz, 2H), 4.32 (s, 2H), 4.24 (dt,  $J$  = 30.5, 4.0 Hz, 2H), 3.82 (s, 3H);  $^{13}\text{C}$  NMR (125 MHz, DMSO- $d_6$ )  $\delta$ : 168.0, 166.9, 163.9 (2), 154.5, 149.8, 149.6, 126.9, 119.6, 116.6, 113.7, 109.5, 83.2 (d,  $J_{\text{CF}}$  = 165.8 Hz), 79.5, 68.4 (d,  $J_{\text{CF}}$  = 18.9 Hz), 56.1, 29.9; HRMS-ESI ( $m/z$ ) [ $\text{M} + \text{H}$ ] $^+$  calcd for  $\text{C}_{17}\text{H}_{18}\text{FN}_5\text{O}_2\text{S}_2$  H, 408.0964; found 408.0978.

**6-(((2-(4-(2-fluoroethoxy)-3-methoxyphenyl)thiazol-4-yl)methyl)thio)-1,3,5-triazine-2,4-**

**diamine (8b).**  $^1\text{H}$  NMR (500 MHz, DMSO- $d_6$ )  $\delta$ : 7.56 (s, 1H), 7.42 – 7.39 (m, 2H), 7.03 (d,  $J$  = 8.0 Hz, 1H), 6.76 (brs, 2H), 6.70 (brs, 2H), 4.72 (dt,  $J$  = 48.0, 4.0 Hz, 2H), 4.34 (s, 2H), 4.24 (dt,  $J$  = 30.5, 4.0 Hz, 2H), 3.82 (s, 3H);  $^{13}\text{C}$  NMR (125 MHz, DMSO- $d_6$ )  $\delta$ : 178.3, 167.2, 166.1 (2), 153.8, 149.9, 149.6, 126.9, 119.7, 116.9, 113.7, 109.5, 83.2 (d,  $J_{\text{CF}}$  = 165.8 Hz), 68.4 (d,  $J_{\text{CF}}$  = 18.9 Hz), 56.1, 29.1; HRMS-ESI ( $m/z$ ) [ $\text{M} + \text{H}$ ] $^+$  calcd for  $\text{C}_{16}\text{H}_{17}\text{FN}_6\text{O}_2\text{S}_2$  H, 409.0917; found 409.0934.

**2-(((2-(3-(2-fluoroethoxy)-4-methoxyphenyl)thiazol-4-yl)methyl)thio)pyrimidine-4,6-**

**diamine (9a).**  $^1\text{H}$  NMR (500 MHz, DMSO- $d_6$ )  $\delta$ : 7.53 (s, 1H), 7.46 (dd,  $J = 8.5, 2.0$  Hz, 1H), 7.44 (d,  $J = 2.0$  Hz, 1H), 7.06 (d,  $J = 8.5$  Hz, 1H), 6.14 (brs, 4H), 5.13 (s, 1H), 4.75 (dt,  $J = 48.0, 4.0$  Hz, 2H), 4.33 (s, 2H), 4.29 (dt,  $J = 30.5, 4.0$  Hz, 2H), 3.82 (s, 3H);  $^{13}\text{C}$  NMR (125 MHz, DMSO- $d_6$ )  $\delta$ : 168.1, 166.9, 163.9 (2), 154.5, 151.2, 148.3, 126.4, 120.3, 116.5, 112.7, 110.9, 83.3 (d,  $J_{\text{CF}} = 166.0$  Hz), 79.5, 68.5 (d,  $J_{\text{CF}} = 18.9$  Hz), 56.1, 29.9; HRMS-ESI ( $m/z$ ) [ $\text{M} + \text{H}$ ] $^+$  calcd for  $\text{C}_{17}\text{H}_{18}\text{FN}_5\text{O}_2\text{S}_2$  H, 408.0964; found 408.0928.

**6-(((2-(3-(2-fluoroethoxy)-4-methoxyphenyl)thiazol-4-yl)methyl)thio)-1,3,5-triazine-2,4-**

**diamine (9b).**  $^1\text{H}$  NMR (500 MHz, DMSO- $d_6$ )  $\delta$ : 7.57 (s, 1H); 7.47 (dd,  $J = 8.5, 2.0$  Hz, 1H), 7.44 (d,  $J = 2.0$  Hz, 1H), 7.06 (d,  $J = 8.5$  Hz, 1H), 6.78 (brs, 2H), 6.73 (brs, 2H), 4.75 (dt,  $J = 47.5, 4.0$  Hz, 2H), 4.36 (s, 2H), 4.29 (dt,  $J = 30.0, 4.0$  Hz, 2H), 3.82 (s, 3H);  $^{13}\text{C}$  NMR (125 MHz, DMSO- $d_6$ )  $\delta$ : 178.3, 167.2, 166.1 (2), 153.8, 151.3, 148.3, 126.4, 120.3, 116.9, 112.7, 110.9, 83.3 (d,  $J_{\text{CF}} = 166.0$  Hz), 68.5 (d,  $J_{\text{CF}} = 18.8$  Hz), 56.1, 29.2; HRMS-ESI ( $m/z$ ) [ $\text{M} + \text{H}$ ] $^+$  calcd for  $\text{C}_{16}\text{H}_{17}\text{FN}_6\text{O}_2\text{S}_2$  H, 409.0917; found 409.0934.

**2-(((2-(4-ethoxy-3-(2-fluoroethoxy)phenyl)thiazol-4-yl)methyl)thio)pyrimidine-4,6-diamine**

**(10a).**  $^1\text{H}$  NMR (500 MHz, DMSO- $d_6$ )  $\delta$ : 7.50 (s, 1H), 7.43 – 7.41 (m, 2H), 7.03 (d,  $J = 9.0$  Hz, 1H), 6.12 (brs, 4H), 5.11 (s, 1H), 4.72 (dt,  $J = 48.0, 4.0$  Hz, 2H), 4.31 (s, 2H), 4.27 (dt,  $J = 30.5, 4.0$  Hz, 2H), 4.06 (q,  $J = 7.0$  Hz, 2H), 1.31 (t,  $J = 7.0$  Hz, 3H);  $^{13}\text{C}$  NMR (125 MHz, DMSO- $d_6$ )  $\delta$ : 168.1, 166.9, 163.9 (2), 154.5, 150.6, 148.4, 126.4, 120.4, 116.5, 113.9, 111.5, 83.3 (d,  $J_{\text{CF}} = 166.0$  Hz), 79.5, 68.7 (d,  $J_{\text{CF}} = 18.8$  Hz), 64.4, 29.9, 15.1; HRMS-ESI ( $m/z$ ) [ $\text{M} + \text{H}$ ] $^+$  calcd for  $\text{C}_{18}\text{H}_{20}\text{FN}_5\text{O}_2\text{S}_2$  H, 422.1121; found 422.1105.

**6-(((2-(4-ethoxy-3-(2-fluoroethoxy)phenyl)thiazol-4-yl)methyl)thio)-1,3,5-triazine-2,4-**

**diamine (10b).**  $^1\text{H}$  NMR (500 MHz, DMSO- $d_6$ )  $\delta$ : 7.54 (s, 1H), 7.43 – 7.42 (m, 2H), 7.03 (d,  $J$  = 9.0 Hz, 1H), 6.76 (brs, 2H), 6.70 (brs, 2H), 4.72 (dt,  $J$  = 48.0, 3.0 Hz, 2H), 4.34 (s, 2H), 4.27 (dt,  $J$  = 30.5, 3.0 Hz, 2H), 4.06 (q,  $J$  = 7.0 Hz, 2H), 1.31 (t,  $J$  = 7.0 Hz, 3H);  $^{13}\text{C}$  NMR (125 MHz, DMSO- $d_6$ )  $\delta$ : 178.3, 167.2, 166.1 (2), 153.8, 150.6, 148.4, 126.3, 120.5, 116.9, 113.9, 111.5, 83.3 (d,  $J_{\text{CF}}$  = 165.9 Hz), 68.7 (d,  $J_{\text{CF}}$  = 18.9 Hz), 64.4, 29.2, 15.1; HRMS-ESI ( $m/z$ ) [ $\text{M} + \text{H}$ ] $^+$  calcd for  $\text{C}_{17}\text{H}_{19}\text{FN}_6\text{O}_2\text{S}_2$  H, 423.1073; found 423.1082.

**2-(((2-(3-(2-fluoroethoxy)-4-methylphenyl)thiazol-4-yl)methyl)thio)pyrimidine-4,6-diamine**

**(11a).**  $^1\text{H}$  NMR (500 MHz, acetone- $d_6$ )  $\delta$ : 7.53 (brs, 1H), 7.45 (s, 1H), 7.43 (dd,  $J$  = 7.5, 1.5 Hz, 1H), 7.24 (d,  $J$  = 8.0 Hz, 1H), 5.65 (brs, 4H), 5.37 (s, 1H), 4.81 (dt,  $J$  = 47.5, 4.0 Hz, 2H), 4.42 (s, 2H), 4.37 (dt,  $J$  = 29.0, 4.0 Hz, 2H), 2.24 (s, 3H);  $^{13}\text{C}$  NMR (125 MHz, acetone- $d_6$ )  $\delta$ : 168.8, 167.0, 164.1 (2), 157.2, 155.1, 132.8, 131.1, 129.0, 118.9, 115.5, 108.7, 82.8 (d,  $J_{\text{CF}}$  = 167.4 Hz), 79.6, 67.8 (d,  $J_{\text{CF}}$  = 19.5 Hz), 29.8, 15.4; HRMS-ESI ( $m/z$ ) [ $\text{M} + \text{H}$ ] $^+$  calcd for  $\text{C}_{17}\text{H}_{18}\text{FN}_5\text{OS}_2$  H, 392.1015; found 392.1029.

**6-(((2-(3-(2-fluoroethoxy)-4-methylphenyl)thiazol-4-yl)methyl)thio)-1,3,5-triazine-2,4-**

**diamine (11b).**  $^1\text{H}$  NMR (500 MHz, DMSO- $d_6$ )  $\delta$ : 7.61 (s, 1H), 7.38 (s, 1H), 7.37 (d,  $J$  = 7.5 Hz, 1H), 7.23 (d,  $J$  = 7.5 Hz, 1H), 6.75 (brs, 2H), 6.70 (brs, 2H), 4.75 (dt,  $J$  = 48.0, 4.0 Hz, 2H), 4.35 (s, 2H), 4.30 (dt,  $J$  = 30.0, 4.0 Hz, 2H), 2.17 (s, 3H);  $^{13}\text{C}$  NMR (125 MHz, DMSO- $d_6$ )  $\delta$ : 178.3, 167.3, 166.1 (2), 157.2, 154.0, 132.5, 131.7, 129.1, 119.3, 117.5, 109.0, 83.4 (d,  $J_{\text{CF}}$  = 165.9 Hz), 68.1 (d,  $J_{\text{CF}}$  = 19.0 Hz), 29.1, 16.4; HRMS-ESI ( $m/z$ ) [ $\text{M} + \text{H}$ ] $^+$  calcd for  $\text{C}_{16}\text{H}_{17}\text{FN}_6\text{OS}_2$  H, 393.0968; found 393.0970.

**2-(((2-(3-(3-fluoropropoxy)-4-methoxyphenyl)thiazol-4-yl)methyl)thio)pyrimidine-4,6-**

**diamine (12a).**  $^1\text{H}$  NMR (500 MHz, DMSO- $d_6$ )  $\delta$ : 7.53 (s, 1H), 7.45 (dd,  $J = 8.5, 2.0$  Hz, 1H), 7.44 (s, 1H), 7.04 (d,  $J = 9.0$  Hz, 1H), 6.16 (brs, 4H), 5.14 (s, 1H), 4.61 (dt,  $J = 47.5, 6.0$  Hz, 2H), 4.34 (s, 2H), 4.12 (t,  $J = 6.0$  Hz, 2H), 3.81 (s, 3H), 2.12 (dt,  $J = 25.5, 6.0, 6.0$  Hz, 2H);  $^{13}\text{C}$  NMR (125 MHz, DMSO- $d_6$ )  $\delta$ : 168.0, 167.0, 163.9 (2), 154.4, 151.3, 148.6, 126.5, 120.1, 116.4, 112.7, 110.7, 81.9 (d,  $J_{\text{CF}} = 160.6$  Hz), 79.5, 65.0 (d,  $J_{\text{CF}} = 5.9$  Hz), 56.2, 30.4 (d,  $J_{\text{CF}} = 19.5$  Hz), 29.9; HRMS-ESI ( $m/z$ ) [ $\text{M} + \text{H}$ ] $^+$  calcd for  $\text{C}_{18}\text{H}_{20}\text{FN}_5\text{O}_2\text{S}_2$  H, 422.1121; found 422.1116.

**6-(((2-(3-(3-fluoropropoxy)-4-methoxyphenyl)thiazol-4-yl)methyl)thio)-1,3,5-triazine-2,4-**

**diamine (12b).**  $^1\text{H}$  NMR (500 MHz, DMSO- $d_6$ )  $\delta$ : 7.55 (s, 1H), 7.50 – 7.41 (m, 2H), 7.03 (d,  $J = 8.5$  Hz, 1H), 6.76 (brs, 2H), 6.69 (brs, 2H), 4.58 (dt,  $J = 47.5, 6.0$  Hz, 2H), 4.34 (s, 2H), 4.10 (t,  $J = 6.0$  Hz, 2H), 3.79 (s, 3H), 2.10 (dt,  $J = 25.0, 6.0, 6.0$  Hz, 2H);  $^{13}\text{C}$  NMR (125 MHz, DMSO- $d_6$ )  $\delta$ : 178.3, 167.2, 166.1 (2), 153.8, 151.3, 148.6, 126.4, 120.1, 116.9, 112.7, 110.7, 81.9 (d,  $J_{\text{CF}} = 160.5$  Hz), 65.0 (d,  $J_{\text{CF}} = 6.0$  Hz), 56.2, 30.4 (d,  $J_{\text{CF}} = 19.6$  Hz), 29.2; HRMS-ESI ( $m/z$ ) [ $\text{M} + \text{H}$ ] $^+$  calcd for  $\text{C}_{17}\text{H}_{19}\text{FN}_6\text{O}_2\text{S}_2$  H, 423.1073; found 423.1076.

**2-(((2-(5-(2-fluoroethoxy)-2-methoxyphenyl)thiazol-4-yl)methyl)thio)pyrimidine-4,6-**

**diamine (13a).**  $^1\text{H}$  NMR (500 MHz, DMSO- $d_6$ )  $\delta$ : 7.75 (d,  $J = 3.5$  Hz, 1H), 7.60 (s, 1H), 7.14 (d,  $J = 9.0$  Hz, 1H), 7.04 (dd,  $J = 9.0, 3.0$  Hz, 1H), 6.12 (brs, 4H), 5.12 (s, 1H), 4.71 (dt,  $J = 48.0, 4.0$  Hz, 2H), 4.36 (s, 2H), 4.21 (dt,  $J = 30.0, 4.0$  Hz, 2H), 3.91 (s, 3H);  $^{13}\text{C}$  NMR (125 MHz, DMSO- $d_6$ )  $\delta$ : 168.2, 163.9 (2), 160.7, 152.9, 152.6, 151.2, 122.4, 118.4, 118.1, 114.4, 112.8, 83.4 (d,  $J_{\text{CF}} = 165.8$  Hz), 79.5, 68.3 (d,  $J_{\text{CF}} = 18.8$  Hz), 56.8, 29.9; HRMS-ESI ( $m/z$ ) [ $\text{M} + \text{H}$ ] $^+$  calcd

for C<sub>17</sub>H<sub>18</sub>FN<sub>5</sub>O<sub>2</sub>S<sub>2</sub> H, 408.0964; found 408.0982.

**6-(((2-(5-(2-fluoroethoxy)-2-methoxyphenyl)thiazol-4-yl)methyl)thio)-1,3,5-triazine-2,4-**

**diamine (13b).** <sup>1</sup>H NMR (500 MHz, DMSO-d<sub>6</sub>) δ: 7.74 (d, *J* = 3.5 Hz, 1H), 7.64 (s, 1H), 7.15 (d, *J* = 9.0 Hz, 1H), 7.05 (dd, *J* = 9.0, 3.5 Hz, 1H), 6.75 (brs, 2H), 6.70 (brs, 2H), 4.71 (dt, *J* = 48.0, 4.0 Hz, 2H), 4.38 (s, 2H), 4.21 (dt, *J* = 30.0, 4.0 Hz, 2H), 3.91 (s, 3H); <sup>13</sup>C NMR (125 MHz, DMSO-d<sub>6</sub>) δ: 178.4, 166.1 (2), 160.9, 152.6, 152.2, 151.2, 122.3, 118.8, 118.2, 114.4, 112.8, 83.4 (d, *J*<sub>CF</sub> = 165.8 Hz), 68.3 (d, *J*<sub>CF</sub> = 18.8 Hz), 56.9, 29.2; HRMS-ESI (*m/z*) [M + H]<sup>+</sup> calcd for C<sub>16</sub>H<sub>17</sub>FN<sub>6</sub>O<sub>2</sub>S<sub>2</sub> H, 409.0917; found 409.0924.

**2-(((2-(4-(2-fluoroethoxy)-2-methoxyphenyl)thiazol-4-yl)methyl)thio)pyrimidine-4,6-**

**diamine (14a).** <sup>1</sup>H NMR (500 MHz, DMSO-d<sub>6</sub>) δ: 8.12 (d, *J* = 8.5 Hz, 1H), 7.47 (s, 1H), 6.76 (d, *J* = 2.0 Hz, 1H), 6.68 (dd, *J* = 8.5, 2.0 Hz, 1H), 6.11 (brs, 4H), 5.11 (s, 1H), 4.73 (dt, *J* = 47.5, 4.0 Hz, 2H), 4.33 (s, 2H), 4.30 (dt, *J* = 30.0, 4.0 Hz, 2H), 3.95 (s, 3H); <sup>13</sup>C NMR (125 MHz, DMSO-d<sub>6</sub>) δ: 168.2, 163.9 (2), 161.3, 161.0, 157.8, 152.4, 129.3, 116.6, 115.4, 107.3, 99.6, 83.2 (d, *J*<sub>CF</sub> = 165.6 Hz), 79.5, 67.9 (d, *J*<sub>CF</sub> = 18.9 Hz), 56.5, 30.0; HRMS-ESI (*m/z*) [M + H]<sup>+</sup> calcd for C<sub>17</sub>H<sub>18</sub>FN<sub>5</sub>O<sub>2</sub>S<sub>2</sub> H, 408.0964; found 408.0956.

**2-(((2-(3,5-difluorophenyl)-5-methylthiazol-4-yl)methyl)thio)pyrimidine-4,6-diamine (16a).**

<sup>1</sup>H NMR (500 MHz, acetone-d<sub>6</sub>) δ: 7.47 – 7.45 (m, 2H), 7.05 (tt, *J* = 9.0, 2.3 Hz, 1H), 5.71 (brs, 4H), 5.38 (s, 1H), 4.43 (s, 2H), 2.55 (s, 3H); <sup>13</sup>C NMR (125 MHz, acetone-d<sub>6</sub>) δ: 168.8, 164.2, 163.9 (2), 162.2 (d, *J*<sub>CF</sub> = 239.6 Hz, 2C), 150.5, 136.8 (t, *J*<sub>CF</sub> = 10.0 Hz), 131.3, 108.4 (dd, *J*<sub>CF</sub> = 20.8, 6.7 Hz, 2C), 104.4 (t, *J*<sub>CF</sub> = 25.9 Hz), 79.5, 27.7, 10.8; HRMS-ESI (*m/z*) [M + H]<sup>+</sup> calcd

for C<sub>15</sub>H<sub>13</sub>F<sub>2</sub>N<sub>5</sub>S<sub>2</sub> H, 366.0659; found 366.0660.

**2-(((2-(3,5-difluorophenyl)-5-ethylthiazol-4-yl)methyl)thio)pyrimidine-4,6-diamine (16b).**

<sup>1</sup>H NMR (500 MHz, acetone-d<sub>6</sub>) δ: 7.51 – 7.48 (m, 2H), 7.06 (tt, *J* = 9.0, 2.2 Hz, 1H), 5.72 (brs, 4H), 5.38 (s, 1H), 4.45 (s, 2H), 3.01 (q, *J* = 7.5 Hz, 2H), 1.27 (t, *J* = 7.5 Hz, 3H); <sup>13</sup>C NMR (125 MHz, acetone-d<sub>6</sub>) δ: 168.8, 164.2, 163.9 (2), 162.2 (d, *J*<sub>CF</sub> = 227.4 Hz, 2C), 149.5, 139.1, 136.9 (t, *J*<sub>CF</sub> = 10.0 Hz), 108.5 (dd, *J*<sub>CF</sub> = 20.7, 6.8 Hz, 2C), 104.2 (t, *J*<sub>CF</sub> = 25.8 Hz), 79.5, 27.7, 19.7, 15.9; HRMS-ESI (*m/z*) [*M* + *H*]<sup>+</sup> calcd for C<sub>16</sub>H<sub>15</sub>F<sub>2</sub>N<sub>5</sub>S<sub>2</sub> H, 380.0815; found 380.0827.

**2-(((2-(3,5-difluorophenyl)-5-propylthiazol-4-yl)methyl)thio)pyrimidine-4,6-diamine (16c).**

<sup>1</sup>H NMR (500 MHz, acetone-d<sub>6</sub>) δ: 7.51 – 7.47 (m, 2H), 7.07 (tt, *J* = 9.0, 2.3 Hz, 1H), 5.72 (brs, 4H), 5.39 (s, 1H), 4.48 (s, 2H), 2.95 (t, *J* = 7.5 Hz, 2H), 1.67 (qt, *J* = 7.4, 7.4 Hz, 2H), 0.97 (t, *J* = 7.3 Hz, 3H); <sup>13</sup>C NMR (125 MHz, acetone-d<sub>6</sub>) δ: 168.8, 164.2, 163.9 (2), 162.2 (d, *J*<sub>CF</sub> = 205.0 Hz, 2C), 150.0, 137.3, 136.8 (t, *J*<sub>CF</sub> = 10.1 Hz), 108.5 (dd, *J*<sub>CF</sub> = 20.8, 6.8 Hz, 2C), 104.3 (t, *J*<sub>CF</sub> = 25.9 Hz), 79.5, 28.0, 27.8, 25.0, 12.9; HRMS-ESI (*m/z*) [*M* + *H*]<sup>+</sup> calcd for C<sub>17</sub>H<sub>17</sub>F<sub>2</sub>N<sub>5</sub>S<sub>2</sub> H, 394.0972; found 394.0963.

**2-(((2-(4-fluorophenyl)-5-methylthiazol-4-yl)methyl)thio)pyrimidine-4,6-diamine (17a).**

<sup>1</sup>H NMR (500 MHz, acetone-d<sub>6</sub>) δ: 7.93 (dd, *J* = 8.8, 5.4 Hz, 2H), 7.22 (dd, *J* = 8.8, 8.8 Hz, 2H), 5.62 (brs, 4H), 5.37 (s, 1H), 4.43 (s, 2H), 2.55 (s, 3H); <sup>13</sup>C NMR (125 MHz, DMSO-d<sub>6</sub>) δ: 168.3, 164.4, 163.9 (2), 162.4, 162.2, 150.1, 130.2 (d, *J*<sub>CF</sub> = 4.1 Hz, 2C), 128.5 (d, *J*<sub>CF</sub> = 8.5 Hz, 2C), 116.7 (d, *J*<sub>CF</sub> = 22.0 Hz), 79.6, 27.9, 11.8; HRMS-ESI (*m/z*) [*M* + *H*]<sup>+</sup> calcd for C<sub>15</sub>H<sub>14</sub>FN<sub>5</sub>S<sub>2</sub> H, 348.0753; found 348.0757.



**2-(((5-ethyl-2-(4-fluorophenyl)thiazol-4-yl)methyl)thio)pyrimidine-4,6-diamine (17b).**  $^1\text{H}$  NMR (500 MHz, acetone- $d_6$ )  $\delta$ : 7.96 – 7.93 (m, 2H), 7.22 (dd,  $J = 8.8, 8.8$  Hz, 2H), 5.65 (brs, 4H), 5.38 (s, 1H), 4.44 (s, 2H), 3.0 (q,  $J = 7.5$  Hz, 2H), 1.27 (t,  $J = 7.5$  Hz, 3H);  $^{13}\text{C}$  NMR (125 MHz, acetone- $d_6$ )  $\delta$ : 168.9, 164.4, 163.9 (2), 162.4, 162.1, 148.9, 130.3 (d,  $J_{\text{CF}} = 3.3$  Hz, 2C), 127.9 (d,  $J_{\text{CF}} = 8.5$  Hz, 2C), 115.8 (d,  $J_{\text{CF}} = 22.0$  Hz), 79.4, 27.8, 19.6, 16.0; HRMS-ESI ( $m/z$ ) [ $\text{M} + \text{H}$ ] $^+$  calcd for  $\text{C}_{16}\text{H}_{16}\text{FN}_5\text{S}_2$  H, 362.0909; found 362.0908.

**2-(((2-(4-fluorophenyl)-5-propylthiazol-4-yl)methyl)thio)pyrimidine-4,6-diamine (17c).**  $^1\text{H}$  NMR (500 MHz, acetone- $d_6$ )  $\delta$ : 7.95 (dd,  $J = 8.9, 5.4$  Hz, 2H), 7.23 (dd,  $J = 8.9, 8.9$  Hz, 2H), 5.62 (brs, 4H), 5.38 (s, 1H), 4.46 (s, 2H), 2.95 (t,  $J = 7.5$  Hz, 2H), 1.68 (qt,  $J = 7.3, 7.3$  Hz, 2H), 0.98 (t,  $J = 7.3$  Hz, 3H);  $^{13}\text{C}$  NMR (125 MHz, DMSO- $d_6$ )  $\delta$ : 168.2, 164.4, 163.9 (2), 162.5, 162.3, 149.7, 130.2 (d,  $J_{\text{CF}} = 2.9$  Hz, 2C), 128.5 (d,  $J_{\text{CF}} = 8.6$  Hz, 2C), 116.7 (d,  $J_{\text{CF}} = 21.9$  Hz), 79.6, 28.2, 27.9, 25.4, 13.9; HRMS-ESI ( $m/z$ ) [ $\text{M} + \text{H}$ ] $^+$  calcd for  $\text{C}_{17}\text{H}_{18}\text{FN}_5\text{S}_2$  H, 376.1066; found 376.1068.

**2-(((2-(3-fluorophenyl)-5-methylthiazol-4-yl)methyl)thio)pyrimidine-4,6-diamine (18a).**  $^1\text{H}$  NMR (500 MHz, acetone- $d_6$ )  $\delta$ : 7.69 (d,  $J = 8.0$  Hz, 1H), 7.64 (ddd,  $J = 8.0, 2.0, 2.0$  Hz, 1H), 7.51 – 7.47 (m, 1H), 7.18 (ddd,  $J = 8.0, 8.0, 2.0$  Hz, 1H), 5.63 (brs, 4H), 5.38 (s, 1H), 4.44 (s, 2H), 2.56 (s, 3H);  $^{13}\text{C}$  NMR (125 MHz, acetone- $d_6$ )  $\delta$ : 169.1, 164.0 (2), 162.1, 161.6, 150.4, 136.0 (d,  $J_{\text{CF}} = 8.1$  Hz), 131.0 (d,  $J_{\text{CF}} = 8.4$  Hz), 130.4, 121.9 (d,  $J_{\text{CF}} = 2.8$  Hz), 116.3 (d,  $J_{\text{CF}} = 21.4$  Hz), 112.2 (d,  $J_{\text{CF}} = 23.5$  Hz), 79.6 (d,  $J_{\text{CF}} = 4.9$  Hz), 28.8, 10.9; HRMS-ESI ( $m/z$ ) [ $\text{M} + \text{H}$ ] $^+$  calcd for  $\text{C}_{15}\text{H}_{14}\text{FN}_5\text{S}_2$  H, 348.0753; found 348.0757.

**2-(((5-ethyl-2-(3-fluorophenyl)thiazol-4-yl)methyl)thio)pyrimidine-4,6-diamine (18b).**  $^1\text{H}$  NMR (500 MHz, acetone- $d_6$ )  $\delta$ : 7.72 (dd,  $J = 7.5, 1.0$  Hz, 1H), 7.67 (d,  $J = 10.0$  Hz, 1H), 7.54 – 7.47 (m, 1H), 7.20 (dd,  $J = 12.0, 5.0$  Hz, 1H), 5.67 (brs, 4H), 5.39 (s, 1H), 4.47 (s, 2H), 3.03 (q,  $J = 7.5$  Hz, 2H), 1.28 (t,  $J = 7.5$  Hz, 3H);  $^{13}\text{C}$  NMR (125 MHz, acetone- $d_6$ )  $\delta$ : 169.1, 164.0 (2), 162.1, 161.8, 149.4 (d,  $J_{\text{CF}} = 4.7$  Hz), 138.3, 136.1 (d,  $J_{\text{CF}} = 8.0$  Hz), 131.0 (d,  $J_{\text{CF}} = 8.4$  Hz), 121.9 (d,  $J_{\text{CF}} = 2.8$  Hz), 116.3 (d,  $J_{\text{CF}} = 21.4$  Hz), 112.2 (d,  $J_{\text{CF}} = 23.5$  Hz), 79.6, 27.9, 19.8, 16.1; HRMS-ESI ( $m/z$ ) [ $\text{M} + \text{H}$ ] $^+$  calcd for  $\text{C}_{16}\text{H}_{16}\text{FN}_5\text{S}_2$  H, 362.0909; found 362.0894.

**2-(((2-(3-fluorophenyl)-5-propylthiazol-4-yl)methyl)thio)pyrimidine-4,6-diamine (18c).**  $^1\text{H}$  NMR (500 MHz, acetone- $d_6$ )  $\delta$ : 7.71 (d,  $J = 8.0$  Hz, 1H), 7.66 (ddd,  $J = 10.0, 2.5, 2.5$  Hz, 1H), 7.49 (ddd,  $J = 8.0, 8.0, 6.0$  Hz, 1H), 7.19 (ddd,  $J = 8.5, 8.5, 2.0$  Hz, 1H), 5.63 (brs, 4H), 5.38 (s, 1H), 4.47 (s, 2H), 2.96 (t,  $J = 7.5$  Hz, 2H), 1.68 (qt,  $J = 7.5, 7.5$  Hz, 2H), 0.98 (t,  $J = 7.5$  Hz, 3H);  $^{13}\text{C}$  NMR (125 MHz, acetone- $d_6$ )  $\delta$ : 169.1, 164.0 (2), 162.1, 161.9, 149.9, 136.4, 136.1 (d,  $J_{\text{CF}} = 8.1$  Hz), 131.0 (d,  $J_{\text{CF}} = 8.4$  Hz), 121.9 (d,  $J_{\text{CF}} = 2.8$  Hz), 116.3 (d,  $J_{\text{CF}} = 21.5$  Hz), 112.2 (d,  $J_{\text{CF}} = 23.5$  Hz), 79.6 (d,  $J_{\text{CF}} = 4.9$  Hz), 27.7, 27.4, 25.2, 13.0; HRMS-ESI ( $m/z$ ) [ $\text{M} + \text{H}$ ] $^+$  calcd for  $\text{C}_{17}\text{H}_{18}\text{FN}_5\text{S}_2$  H, 376.1066; found 376.1067.

**2-(3-(4-(((4,6-diaminopyrimidin-2-yl)thio)methyl)-5-propylthiazol-2-yl)phenoxy)ethanol**

**(25).**  $^1\text{H}$  NMR (500 MHz, DMSO- $d_6$ )  $\delta$ : 7.38 – 7.32 (m, 3H), 7.00 – 6.98 (m, 1H), 6.10 (brs, 4H), 5.13 (s, 1H), 4.84 (t,  $J = 5.5$  Hz, 1H), 4.38 (s, 2H), 4.01 (t,  $J = 5.0$  Hz, 2H), 3.69 (dt,  $J = 5.0, 5.0$  Hz, 2H), 2.84 (t,  $J = 7.5$  Hz, 2H), 1.56 (qt,  $J = 7.3, 7.3$  Hz, 2H), 0.89 (t,  $J = 7.0$  Hz, 3H);  $^{13}\text{C}$  NMR (125 MHz, DMSO- $d_6$ )  $\delta$ : 168.1, 163.8 (2), 163.3, 159.5, 149.5, 135.9, 134.7, 130.7, 118.5,

116.7, 111.4, 79.4, 70.1, 59.9, 28.0, 27.9, 25.2, 13.8; HRMS-ESI ( $m/z$ ) [ $M + H$ ]<sup>+</sup> calcd for C<sub>19</sub>H<sub>23</sub>N<sub>5</sub>O<sub>2</sub>S<sub>2</sub> H, 418.1371; found 418.1351.

**2-(5-(4-(((4,6-diaminopyrimidin-2-yl)thio)methyl)-5-propylthiazol-2-yl)-2-**

**fluorophenoxy)ethanol (26).** <sup>1</sup>H NMR (500 MHz, DMSO-d<sub>6</sub>) δ: 7.55 (d,  $J$  = 8.0 Hz, 1H), 7.40 – 7.37 (m, 1H), 7.29 (dd,  $J$  = 11.0, 8.5 Hz, 1H), 6.14 (brs, 4H), 5.15 (s, 1H), 4.93 (t,  $J$  = 5.0 Hz, 1H), 4.40 (s, 2H), 4.13 (t,  $J$  = 4.5 Hz, 2H), 3.73 (dt,  $J$  = 5.0, 5.0 Hz, 2H), 2.85 (t,  $J$  = 7.5 Hz, 2H), 1.57 (qt,  $J$  = 7.5, 7.5 Hz, 2H), 0.90 (t,  $J$  = 7.5 Hz, 3H); <sup>13</sup>C NMR (125 MHz, DMSO-d<sub>6</sub>) δ: 168.2, 163.9 (2), 162.7, 154.1, 152.1, 149.6, 147.6 (d,  $J_{CF}$  = 11.0 Hz), 136.2, 130.5 (d,  $J_{CF}$  = 3.4 Hz), 119.2 (d,  $J_{CF}$  = 7.3 Hz), 117.3 (d,  $J_{CF}$  = 19.0 Hz), 112.1, 79.5, 71.3, 59.9, 28.2, 25.4, 13.9; HRMS-ESI ( $m/z$ ) [ $M + H$ ]<sup>+</sup> calcd for C<sub>19</sub>H<sub>22</sub>FN<sub>5</sub>O<sub>2</sub>S<sub>2</sub> H, 436.1277; found 436.1262.

**2-(3-(4-(((4,6-diaminopyrimidin-2-yl)thio)methyl)-5-propylthiazol-2-yl)-5-**

**fluorophenoxy)ethanol (27).** <sup>1</sup>H NMR (500 MHz, DMSO-d<sub>6</sub>) δ: 7.20 (d,  $J$  = 8.0 Hz, 1H), 7.19 (s, 1H), 6.92 (ddd,  $J$  = 11.0, 2.0, 2.0 Hz, 1H), 6.14 (brs, 4H), 5.14 (s, 1H), 4.91 (t,  $J$  = 5.5 Hz, 1H), 4.40 (s, 2H), 4.05 (t,  $J$  = 5.0 Hz, 2H), 3.70 (dt,  $J$  = 5.0, 5.0 Hz, 2H), 2.87 (t,  $J$  = 7.5 Hz, 2H), 1.58 (qt,  $J$  = 7.5, 7.5 Hz, 2H), 0.90 (t,  $J$  = 7.5 Hz, 3H); <sup>13</sup>C NMR (125 MHz, DMSO-d<sub>6</sub>) δ: 168.1, 164.7, 163.9 (2), 162.7, 162.1 (d,  $J_{CF}$  = 3.8 Hz), 161.1 (d,  $J_{CF}$  = 11.9 Hz), 149.9, 136.9, 135.9 (d,  $J_{CF}$  = 10.6 Hz), 108.5, 105.0 (d,  $J_{CF}$  = 23.9 Hz), 103.9 (d,  $J_{CF}$  = 25.0 Hz), 79.5, 70.8, 59.8, 28.2, 25.4, 13.9; HRMS-ESI ( $m/z$ ) [ $M + H$ ]<sup>+</sup> calcd for C<sub>19</sub>H<sub>22</sub>FN<sub>5</sub>O<sub>2</sub>S<sub>2</sub> H, 436.1277; found 436.1287.

**N-(2-(3-(4-(((4,6-diaminopyrimidin-2-yl)thio)methyl)-5-propylthiazol-2-**

**yl)phenoxy)ethyl)methanesulfonamide (28).** <sup>1</sup>H NMR (500 MHz, acetone-d<sub>6</sub>) δ: 7.51 – 7.50

(m, 1H), 7.47 (d,  $J = 7.5$  Hz, 1H), 7.37 (t,  $J = 8.0$  Hz, 1H), 7.03 (dd,  $J = 8.0, 2.2$  Hz, 1H), 6.42 (brs, 1H), 5.64 (brs, 4H), 5.39 (s, 1H), 4.48 (s, 2H), 4.22 (t,  $J = 5.5$  Hz, 2H), 3.56 (dt,  $J = 11.3, 5.5$  Hz, 2H), 3.00 (s, 3H), 2.95 (t,  $J = 7.5$  Hz, 2H), 1.69 (qt,  $J = 7.5, 7.5$  Hz, 2H), 0.99 (t,  $J = 7.5$  Hz, 3H);  $^{13}\text{C}$  NMR (125 MHz, acetone- $d_6$ )  $\delta$ : 169.1, 164.0 (2), 163.3, 159.1, 149.6, 135.7, 135.2, 130.2, 118.7, 115.9, 111.5, 79.6, 67.4, 42.4, 39.5, 28.1, 28.0, 25.2, 13.0; HRMS-ESI ( $m/z$ ) [ $\text{M} + \text{H}$ ] $^+$  calcd for  $\text{C}_{20}\text{H}_{26}\text{N}_6\text{O}_3\text{S}_3$  H, 495.1307; found 495.1285.

**N-(2-(3-(4-(((4,6-diaminopyrimidin-2-yl)thio)methyl)-5-propylthiazol-2-yl)-5-**

**fluorophenoxy)ethyl)methanesulfonamide (29).**  $^1\text{H}$  NMR (500 MHz, acetone- $d_6$ )  $\delta$ : 7.32 (s, 1H), 7.26 – 7.22 (m, 1H), 6.84 (dt,  $J = 10.6, 2.2$  Hz, 1H), 6.43 (brs, 1H), 5.64 (s, 4H), 5.39 (s, 1H), 4.48 (s, 2H), 4.25 (t,  $J = 5.5$  Hz, 2H), 3.56 (dt,  $J = 11.2, 5.5$  Hz, 2H), 3.00 (s, 3H), 2.97 (t,  $J = 7.5$  Hz, 2H), 1.69 (qt,  $J = 7.5, 7.5$  Hz, 2H), 0.99 (t,  $J = 7.5$  Hz, 3H).  $^{13}\text{C}$  NMR (125 MHz, acetone- $d_6$ )  $\delta$ : 169.0, 164.7, 163.9 (2), 162.7, 161.9 (d,  $J_{\text{CF}} = 3.8$  Hz), 160.6 (d,  $J_{\text{CF}} = 11.7$  Hz), 149.9, 136.4 (d,  $J_{\text{CF}} = 10.4$  Hz), 108.1 (d,  $J_{\text{CF}} = 10.2$  Hz), 105.1 (d,  $J_{\text{CF}} = 24.0$  Hz), 103.1 (d,  $J_{\text{CF}} = 25.4$  Hz), 79.6, 67.9, 42.3, 39.5, 29.7, 28.1, 25.2, 13.0; HRMS-ESI ( $m/z$ ) [ $\text{M} + \text{H}$ ] $^+$  calcd for  $\text{C}_{20}\text{H}_{25}\text{FN}_6\text{O}_3\text{S}_3$  H, 513.1213; found 513.1203.

**2,2'-((4-(4-(((4,6-diaminopyrimidin-2-yl)thio)methyl)-5-propylthiazol-2-yl)-1,2-**

**phenylene)bis(oxy))diethanol (30).**  $^1\text{H}$  NMR (500 MHz, DMSO- $d_6$ )  $\delta$ : 7.38 (d,  $J = 2.0$  Hz, 1H), 7.33 (dd,  $J = 8.5, 2.0$  Hz, 1H), 7.01 (d,  $J = 8.5$  Hz, 1H), 6.12 (brs, 4H), 5.12 (s, 1H), 4.85 (t,  $J = 5.5$  Hz, 1H), 4.83 (t,  $J = 5.5$  Hz, 1H), 4.36 (s, 2H), 4.01 (dt,  $J = 5.5, 5.5$  Hz, 4H), 3.69 (t,  $J = 5.0$  Hz, 4H), 2.81 (t,  $J = 7.5$  Hz, 2H), 1.55 (qt,  $J = 7.5, 7.5$  Hz, 2H), 0.88 (t,  $J = 7.5$  Hz, 3H);  $^{13}\text{C}$  NMR (125 MHz, DMSO- $d_6$ )  $\delta$ : 168.3, 163.9 (2), 163.8, 150.6, 149.1, 149.0, 134.9, 126.6, 119.7,

114.1, 111.1, 79.5, 71.0, 70.8, 59.99, 59.93, 28.2, 28.1, 25.4, 13.9; HRMS-ESI ( $m/z$ ) [ $M + H$ ]<sup>+</sup> calcd for C<sub>21</sub>H<sub>27</sub>N<sub>5</sub>O<sub>4</sub>S<sub>2</sub> H, 478.1583; found 478.1595.

**5-(4-(((4,6-diaminopyrimidin-2-yl)thio)methyl)-5-propylthiazol-2-yl)-2-methoxyphenol (31).**

<sup>1</sup>H NMR (500 MHz, DMSO-d<sub>6</sub>) δ: 9.36 (s, 1H), 7.30 (d,  $J = 2.0$  Hz, 1H), 7.23 (dd,  $J = 8.5, 2.0$  Hz, 1H), 6.96 (d,  $J = 8.5$  Hz, 1H), 6.12 (brs, 4H), 5.14 (s, 1H), 4.36 (s, 2H), 3.79 (s, 3H), 2.82 (t,  $J = 7.5$  Hz, 2H), 1.56 (qt,  $J = 7.5, 7.5$  Hz, 2H), 0.90 (t,  $J = 7.5$  Hz, 3H); <sup>13</sup>C NMR (125 MHz, DMSO-d<sub>6</sub>) δ: 168.3, 163.9 (2), 163.8, 149.8, 149.0, 147.2, 134.6, 126.6, 117.8, 112.9, 112.7, 79.5, 56.1, 49.1, 28.2, 25.4, 13.9; HRMS-ESI ( $m/z$ ) [ $M + H$ ]<sup>+</sup> calcd for C<sub>18</sub>H<sub>21</sub>N<sub>5</sub>O<sub>2</sub>S<sub>2</sub> H, 404.1215; found 404.1198.

**3-(5-(4-(((4,6-diaminopyrimidin-2-yl)thio)methyl)-5-propylthiazol-2-yl)-2-**

**methoxyphenoxy)propan-1-ol (32).** <sup>1</sup>H NMR (500 MHz, acetone-d<sub>6</sub>) δ: 7.53 (d,  $J = 2.0$  Hz, 1H), 7.42 (dd,  $J = 8.0, 2.0$  Hz, 1H), 7.01 (d,  $J = 8.0$  Hz, 1H), 5.64 (brs, 4H), 5.39 (s, 1H), 4.45 (s, 2H), 4.19 (t,  $J = 6.0$  Hz, 2H), 3.86 (s, 3H), 3.78 – 3.76 (m, 2H), 2.92 (t,  $J = 7.5$  Hz, 2H), 2.03 (tt,  $J = 6.0, 6.0$  Hz, 2H), 1.68 (qt,  $J = 7.5, 7.5$  Hz, 2H), 0.98 (t,  $J = 7.5$  Hz, 3H); <sup>13</sup>C NMR (125 MHz, acetone-d<sub>6</sub>) δ: 169.2, 164.0, 163.9 (2), 163.7, 151.2, 149.0, 134.5, 126.9, 119.0, 111.8, 110.2, 79.5, 66.1, 58.5, 55.3, 32.5, 29.7, 28.1, 25.2, 13.1; HRMS-ESI ( $m/z$ ) [ $M + H$ ]<sup>+</sup> calcd for C<sub>21</sub>H<sub>27</sub>N<sub>5</sub>O<sub>3</sub>S<sub>2</sub> H, 462.1634; found 462.1616.

**2-(5-(4-(((4,6-diaminopyrimidin-2-yl)thio)methyl)-5-propylthiazol-2-yl)-2-**

**methoxyphenoxy)ethanol (33).** <sup>1</sup>H NMR (500 MHz, DMSO-d<sub>6</sub>) δ: 7.35 (s, 1H), 7.34 (d,  $J = 9.5$  Hz, 1H), 7.00 (d,  $J = 9.0$  Hz, 1H), 6.11 (brs, 4H), 5.12 (s, 1H), 4.84 (t,  $J = 5.5$  Hz, 1H), 4.35 (s,

2H), 3.99 (t,  $J = 5.0$  Hz, 2H), 3.77 (s, 3H), 3.69 (dt,  $J = 5.0, 5.0$  Hz, 2H), 2.80 (t,  $J = 7.5$  Hz, 2H), 1.54 (qt,  $J = 7.3, 7.3$  Hz, 2H), 0.88 (t,  $J = 7.5$  Hz, 3H);  $^{13}\text{C}$  NMR (125 MHz, DMSO- $d_6$ )  $\delta$ : 168.3, 163.9 (2), 163.8, 151.1, 149.1, 148.8, 134.9, 126.5, 119.5, 112.6, 110.4, 79.5, 70.8, 59.9, 56.0, 28.2, 28.0, 25.4, 13.9; HRMS-ESI ( $m/z$ ) [ $\text{M} + \text{H}$ ] $^+$  calcd for  $\text{C}_{20}\text{H}_{25}\text{N}_5\text{O}_3\text{S}_2$  H, 448.1477; found 448.1471.

**2-(5-(4-(((4-aminopyrimidin-2-yl)thio)methyl)-5-propylthiazol-2-yl)-2-**

**methoxyphenoxy)ethanol (34).**  $^1\text{H}$  NMR (500 MHz, acetone- $d_6$ )  $\delta$ : 7.98 (d,  $J = 6.0$  Hz, 1H), 7.52 (d,  $J = 2.0$  Hz, 1H), 7.42 (dd,  $J = 8.5, 2.0$  Hz, 1H), 6.99 (d,  $J = 8.5$  Hz, 1H), 6.38 (brs, 2H), 6.27 (d,  $J = 5.5$  Hz, 1H), 4.47 (s, 2H), 4.13 (t,  $J = 5.0$  Hz, 2H), 3.90 (t,  $J = 5.0$  Hz, 2H), 3.84 (s, 3H), 3.02 (brs, 1H), 2.89 (t,  $J = 7.5$  Hz, 2H), 1.65 (qt,  $J = 7.5, 7.5$  Hz, 2H), 0.96 (t,  $J = 7.5$  Hz, 3H);  $^{13}\text{C}$  NMR (125 MHz, acetone- $d_6$ )  $\delta$ : 170.4, 163.8, 163.5, 155.3, 151.5, 148.9, 148.4, 134.7, 126.8, 119.4, 112.1, 111.1, 101.0, 70.9, 60.5, 55.3, 48.9, 28.0, 25.2, 13.1; HRMS-ESI ( $m/z$ ) [ $\text{M} + \text{H}$ ] $^+$  calcd for  $\text{C}_{20}\text{H}_{24}\text{N}_4\text{O}_3\text{S}_2$  H, 433.1368; found 433.0613.

**1-(5-(4-(((4,6-diaminopyrimidin-2-yl)thio)methyl)-5-propylthiazol-2-yl)-2-**

**methoxyphenoxy)propan-2-ol (35).**  $^1\text{H}$  NMR (500 MHz, acetone- $d_6$ )  $\delta$ : 7.54 (d,  $J = 2.0$  Hz, 1H), 7.45 (dd,  $J = 8.5, 2.0$  Hz, 1H), 7.03 (d,  $J = 8.5$  Hz, 1H), 5.62 (brs, 4H), 5.39 (s, 1H), 4.45 (s, 2H), 4.13 (qt,  $J = 6.0, 6.0$  Hz, 1H), 3.96 (d,  $J = 6.0$  Hz, 2H), 3.87 (s, 3H), 2.93 (t,  $J = 7.5$  Hz, 2H), 1.69 (qt,  $J = 7.5, 7.5$  Hz, 2H), 1.26 (d,  $J = 6.0$  Hz, 3H), 0.98 (t,  $J = 7.5$  Hz, 3H);  $^{13}\text{C}$  NMR (125 MHz, acetone- $d_6$ )  $\delta$ : 169.2, 164.0 (2), 163.6, 151.4, 149.0, 148.9, 134.5, 126.9, 119.4, 112.1, 111.3, 79.5, 74.9, 65.5, 55.4, 29.7, 28.1, 25.2, 19.3, 13.1; HRMS-ESI ( $m/z$ ) [ $\text{M} + \text{H}$ ] $^+$  calcd for  $\text{C}_{21}\text{H}_{27}\text{N}_5\text{O}_3\text{S}_2$  H, 462.1634; found 462.1627.

**1-(5-(4-(((4,6-diaminopyrimidin-2-yl)thio)methyl)-5-propylthiazol-2-yl)-2-**

**methoxyphenoxy)-2-methylpropan-2-ol (36).**  $^1\text{H}$  NMR (500 MHz, MeOD)  $\delta$ : 7.51 (d,  $J = 2.0$  Hz, 1H), 7.39 (dd,  $J = 8.5, 2.0$  Hz, 1H), 7.00 (d,  $J = 8.5$  Hz, 1H), 5.48 (s, 1H), 5.32 (s, 1H), 4.48 (s, 2H), 3.89 (s, 3H), 3.86 (s, 2H), 2.88 (t,  $J = 7.5$  Hz, 2H), 1.67 (qt,  $J = 7.5, 7.5$  Hz, 2H), 1.33 (s, 6H), 0.98 (t,  $J = 7.5$  Hz, 3H);  $^{13}\text{C}$  NMR (125 MHz, MeOD)  $\delta$ : 168.8, 165.2, 163.8 (2), 151.2, 148.9, 148.0, 135.4, 126.4, 119.7, 111.8, 110.7, 79.2, 77.0, 69.6, 55.2, 48.4, 27.9, 27.8, 25.0, 24.9, 12.6; HRMS-ESI ( $m/z$ )  $[\text{M} + \text{H}]^+$  calcd for  $\text{C}_{22}\text{H}_{29}\text{N}_5\text{O}_3\text{S}_2$  H, 476.1790; found 476.1772.

**N-(2-(5-(4-(((4,6-diaminopyrimidin-2-yl)thio)methyl)-5-propylthiazol-2-yl)-2-**

**methoxyphenoxy)ethyl)methanesulfonamide (37).**  $^1\text{H}$  NMR (500 MHz, DMSO- $d_6$ )  $\delta$ : 7.41 (dd,  $J = 7.5, 2.0$  Hz, 1H), 7.39 (s, 1H), 7.25 (t,  $J = 6.0$  Hz, 1H), 7.05 (d,  $J = 8.5$  Hz, 1H), 6.13 (brs, 4H), 5.15 (s, 1H), 4.39 (s, 2H), 4.07 (t,  $J = 5.5$  Hz, 2H), 3.80 (s, 3H), 3.36 (dt,  $J = 5.5, 5.5$  Hz, 2H), 3.15 (d,  $J = 5.5$  Hz, 1H), 2.98 (s, 3H), 2.84 (t,  $J = 7.5$  Hz, 2H), 1.58 (qt,  $J = 7.5, 7.5$  Hz, 2H), 0.91 (t,  $J = 7.5$  Hz, 3H);  $^{13}\text{C}$  NMR (125 MHz, DMSO- $d_6$ )  $\delta$ : 168.3, 163.9 (2), 163.7, 151.1, 149.1, 148.3, 135.0, 126.5, 119.9, 112.7, 110.6, 79.5, 68.3, 60.2, 42.4, 31.2, 28.2, 28.0, 25.4, 13.9; HRMS-ESI ( $m/z$ )  $[\text{M} + \text{H}]^+$  calcd for  $\text{C}_{21}\text{H}_{28}\text{N}_6\text{O}_4\text{S}_3$  H, 525.1412; found 525.1404.

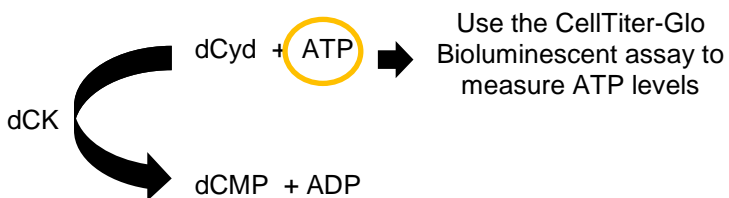

Figure S1. HTS Schematic

Scheme S2. Synthesis of Compounds **8a** and **8b**<sup>a</sup>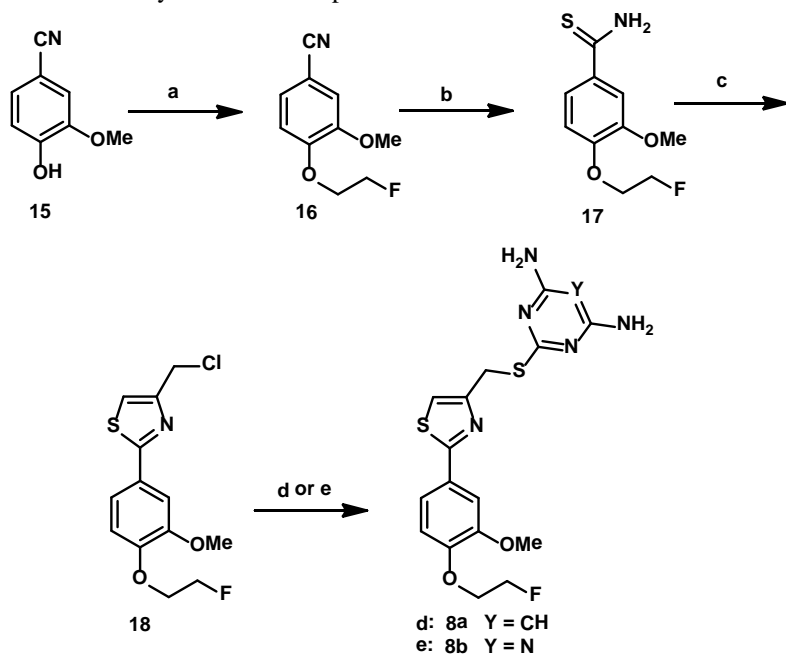

<sup>a</sup> Reagents and conditions: (a) 1-bromo-2-fluoroethane,  $\text{Cs}_2\text{CO}_3$ , DMF, 89%; (b)  $(\text{NH}_4)_2\text{S}$  (20% in  $\text{H}_2\text{O}$ ), pyridine,  $\text{Et}_3\text{N}$ , 87%; (c) 1,3-dichloroacetone, EtOH, 83%; (d) 4,6-diamino-2-mercaptopyrimidine, NaOH, EtOH, 75%; (e) 4,6-diamino-1,3,5-triazine-2(1H)-thione, NaOH, EtOH, 72%.



Scheme S3. Synthesis of Compound 37<sup>a</sup>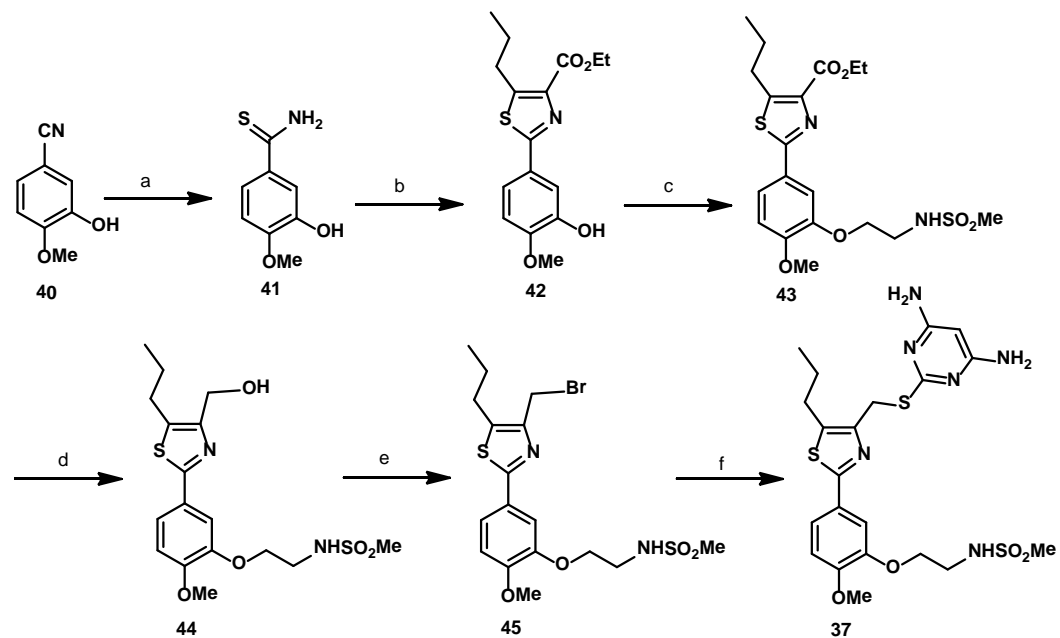

<sup>a</sup> Reagents and conditions: (a)  $(\text{NH}_4)_2\text{S}$  (20% in  $\text{H}_2\text{O}$ ), pyridine,  $\text{Et}_3\text{N}$ , 90% ; (b) ethyl 3-bromo-2-oxohexanoate, EtOH, 60%; (c) *N*-(2-bromoethyl)methanesulfonamide,  $\text{Cs}_2\text{CO}_3$ , DMF, 78% (borsm); (d) DIBAL-H,  $\text{CH}_2\text{Cl}_2$ , 90%; (e) 1,1,1,3,3,3-hexabromoacetone,  $\text{PPh}_3$ ,  $\text{CH}_3\text{CN}$ , 95%; (f) 4,6-diamino-2-mercaptopyrimidine, NaOH, EtOH, 92%.

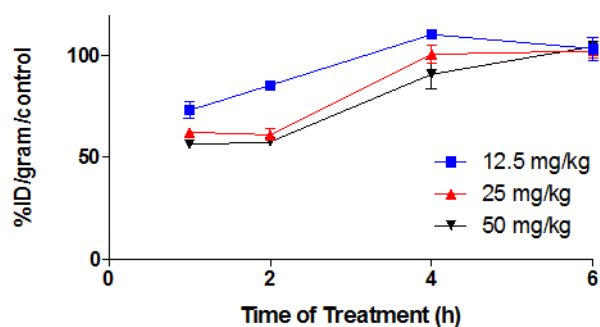

Figure S4. Dose escalation and time course for inhibition of  $^{18}\text{F}$ -L-FAC uptake in the liver for compound 33, one of the compounds with the greatest inhibitory activity *in vitro*.
